# Supplementary material for: Toll-like receptor 4 and macrophage scavenger receptor 1 crosstalk regulates phagocytosis of a fungal pathogen
Source: PubMed Central journal article supplement (PMC10425417; doi:10.1038/s41467-023-40635-w), 2023-08-14
Supplement: 41467_2023_40635_MOESM3_ESM.pdf [file 41467_2023_40635_MOESM3_ESM.pdf]

## **Description of Additional Supplementary Files**

File Name: Supplementary Data 1

Description: List of inhibitors and ligands used to block macrophage pattern recognition receptors (PRRs) and their downstream signalling molecules.
